# Supplementary material for: Shifts in the clinical epidemiology of severe malaria after scaling up control strategies in Mali
Source: PubMed Central journal article supplement (PMC9744791; doi:10.3389/fneur.2022.988960), 2022-11-29

# CARTE DU MALI

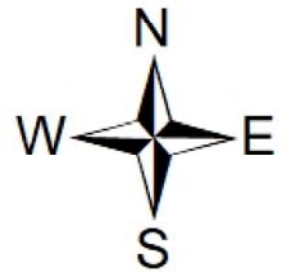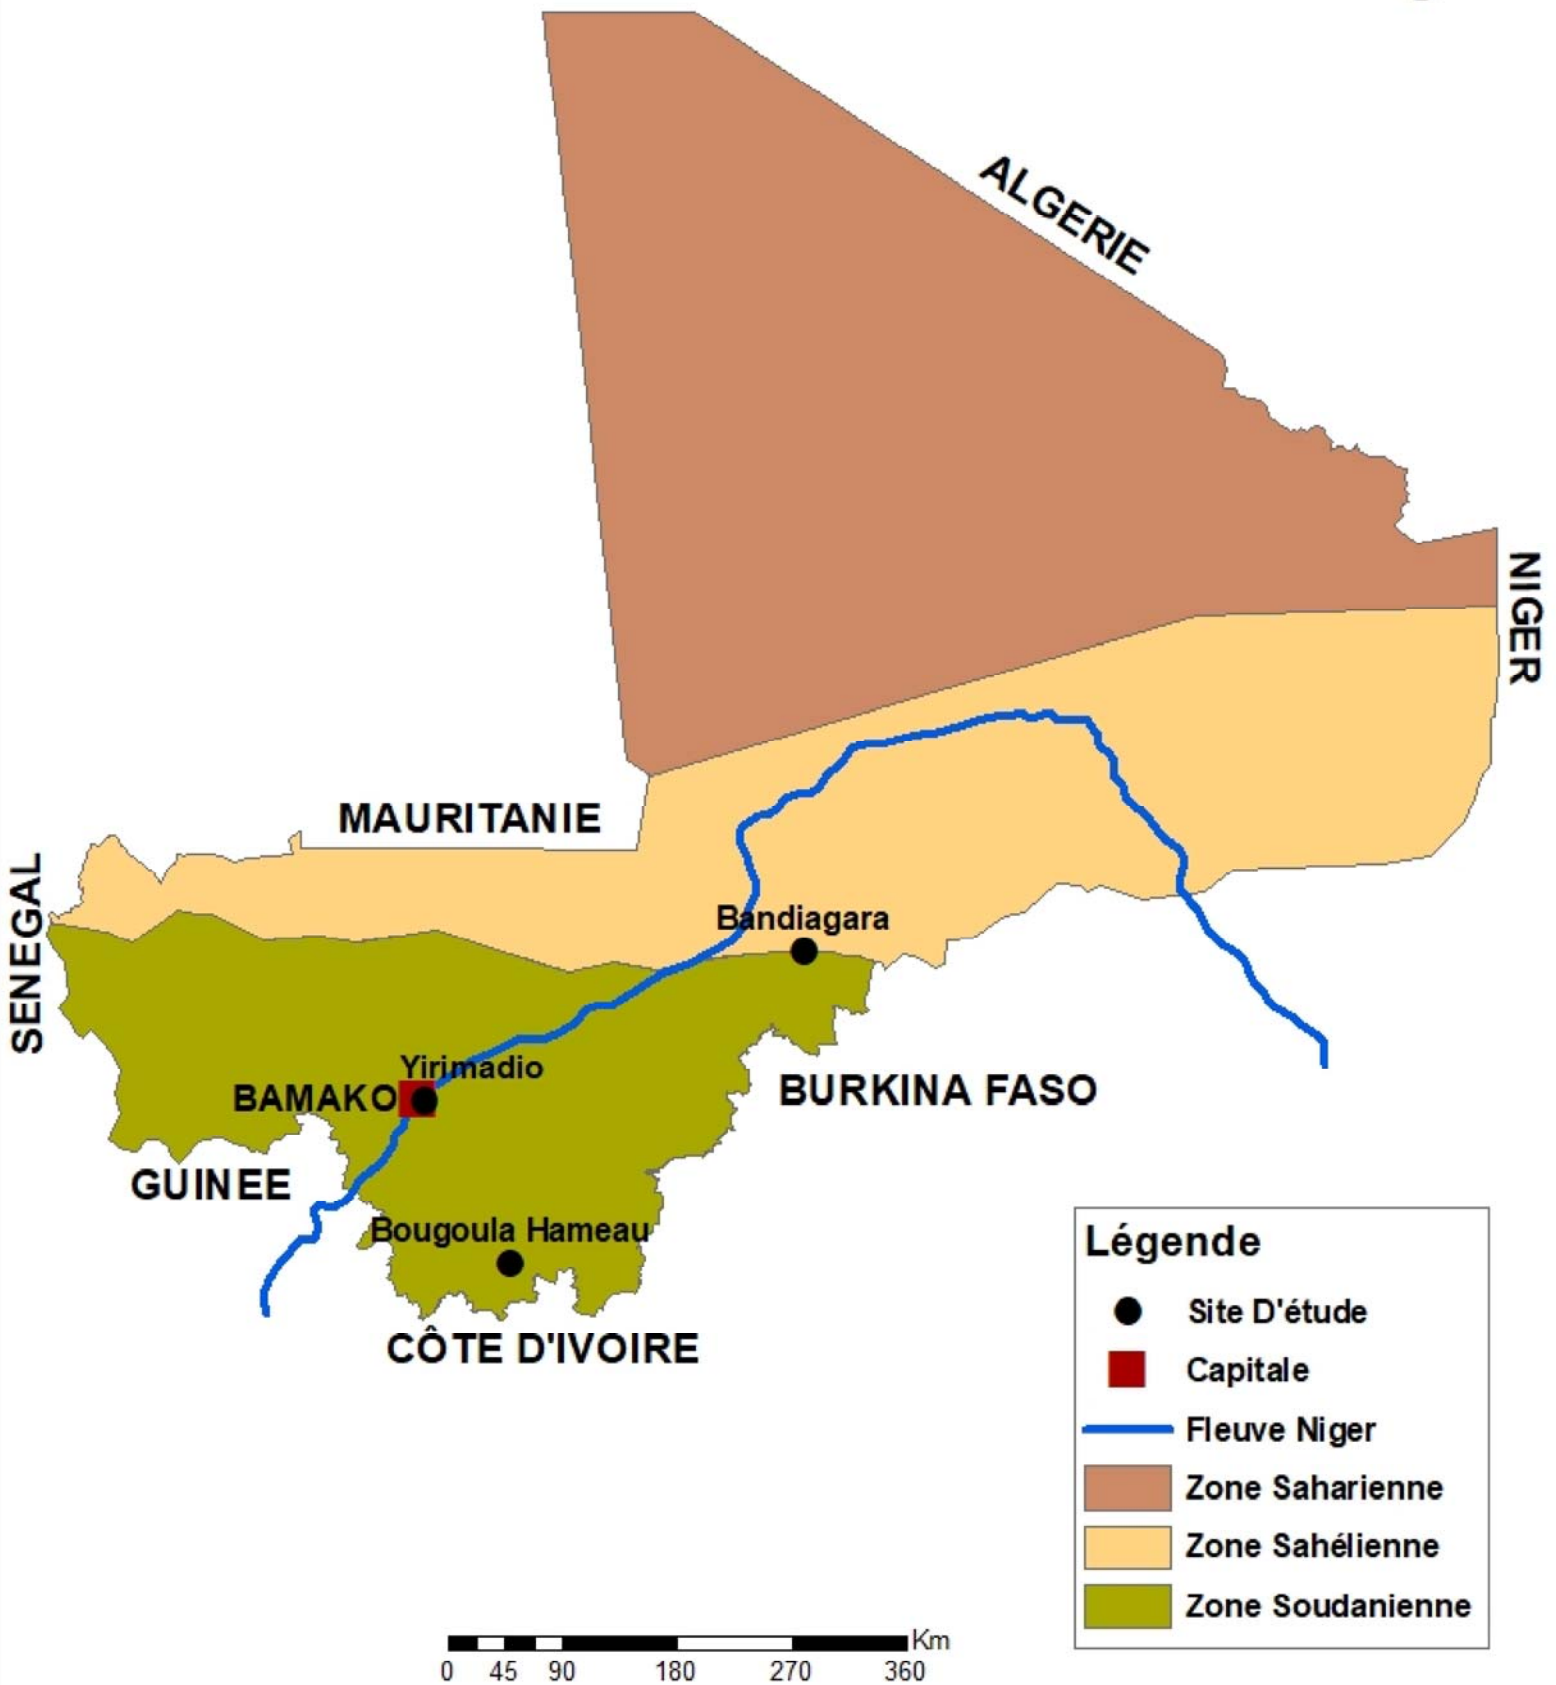

**Légende**

- Site D'étude
- Capitale
- Fleuve Niger
- Zone Saharienne
- Zone Sahélienne
- Zone Soudanienne

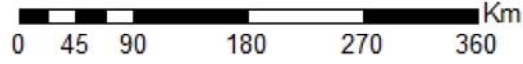

Supplement: Image_1.pdf [file Image_1.pdf]
