# Supplementary material for: Shifts in the clinical epidemiology of severe malaria after scaling up control strategies in Mali
Source: PubMed Central journal article supplement (PMC9744791; doi:10.3389/fneur.2022.988960), 2022-11-29
Supplement: Image_2.pdf [file Image_2.pdf]

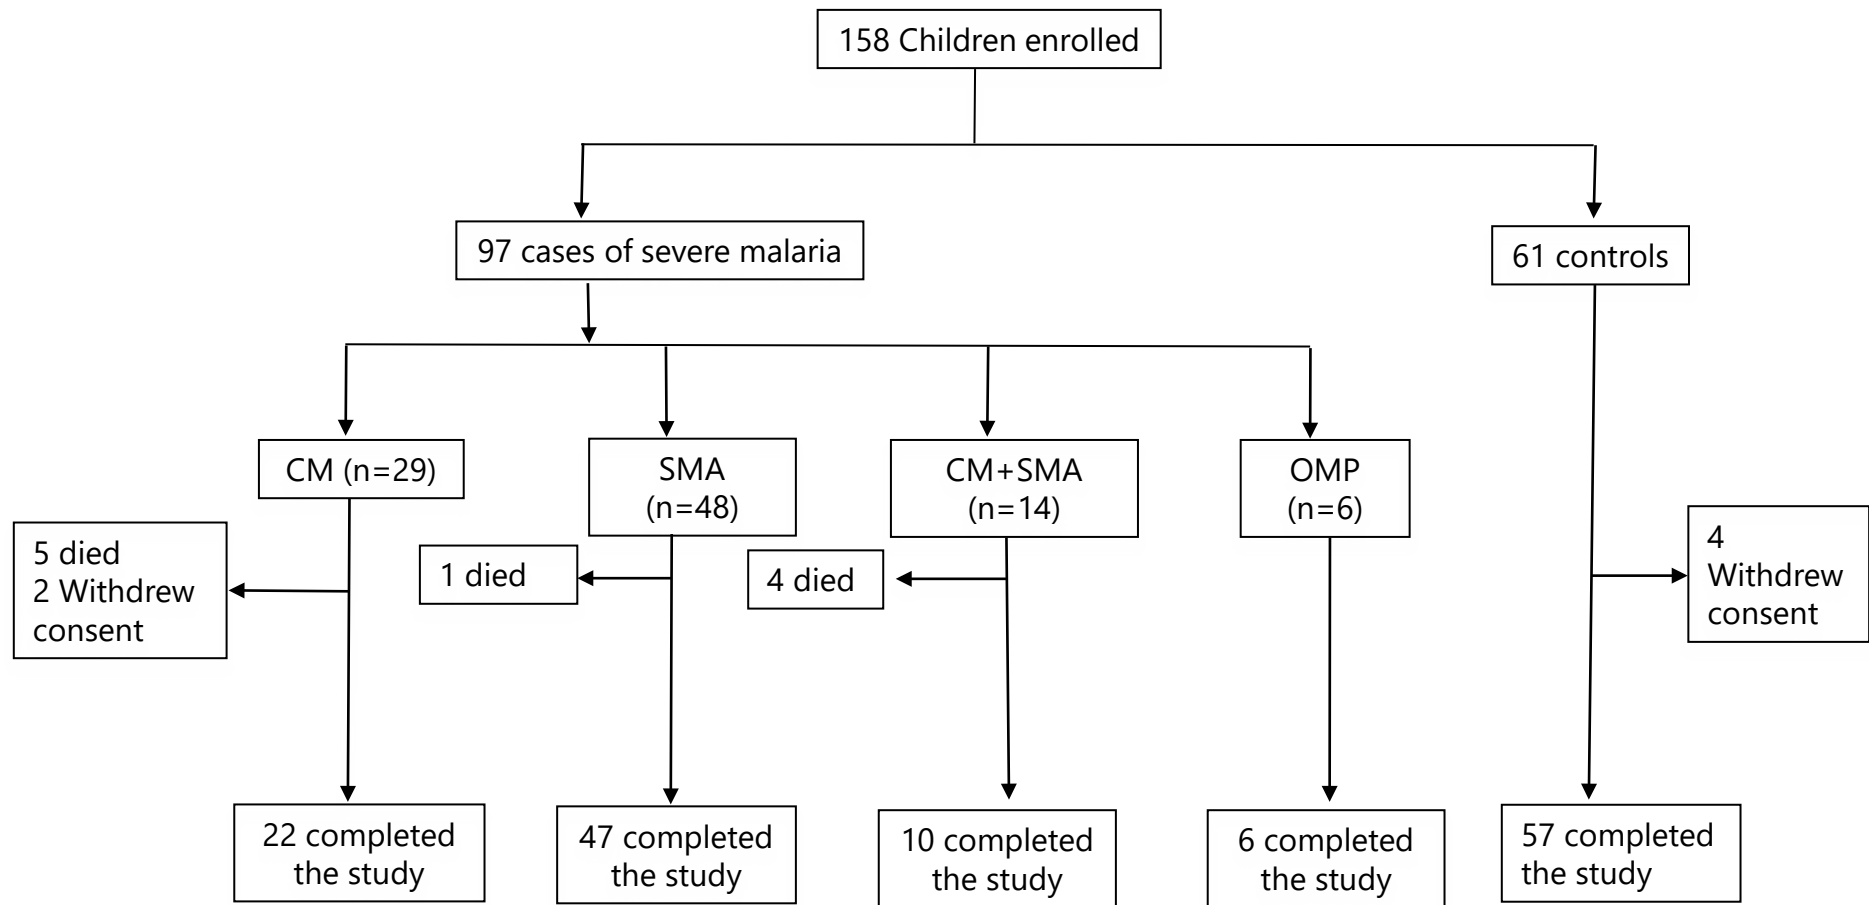

**Supplementary Figure 2: Consort diagram of the case-control study**
