# Supplementary material for: Shifts in the clinical epidemiology of severe malaria after scaling up control strategies in Mali
Source: PubMed Central journal article supplement (PMC9744791; doi:10.3389/fneur.2022.988960), 2022-11-29
Supplement: Table_1.pdf [file Table_1.pdf]

**Supplementary Table 1: Distribution of severe malaria cases by Blantyre Coma Score (BCS) on day 0 (day of diagnosis) and after recovery.**

| Blantyre score | Day 0 | After recovery |
|----------------|-------|----------------|
| 1              | 20    | 0              |
| 2              | 27    | 0              |
| 3              | 10    | 0              |
| 4              | 3     | 1              |
| 5              | 37    | 80             |
| Total          | 97    | 81             |

The Blantyre Coma Score (BSC) was not collected for 16 children after recovery, including for the nine cases that died.
