# Supplementary material for: Shifts in the clinical epidemiology of severe malaria after scaling up control strategies in Mali
Source: PubMed Central journal article supplement (PMC9744791; doi:10.3389/fneur.2022.988960), 2022-11-29
Supplement: Table_2.pdf [file Table_2.pdf]

**Supplementary Table 2: Distribution of cases with severe malaria anemia by parasite density in the case-control study.**

| Clinical Phenotype  | Parasite density |             |             |          | Total |
|---------------------|------------------|-------------|-------------|----------|-------|
|                     | <10000           | 10001-50000 | 50001-99999 | ≥ 100000 |       |
|                     | n                | n           | n           | n        |       |
| SMA only            | 18               | 14          | 8           | 8        | 48    |
| SMA+CM              | 9                | 1           | 1           | 3        | 14    |
| SMA+CM+Hypoglycemia | 2                | 1           | 0           | 1        | 4     |
| Total               | 30               | 16          | 9           | 12       | 67    |

Most severe malaria anemia cases are associated with *P. falciparum* parasite density below 10,000 parasites per  $\mu\text{L}$ .
