# Supplementary material for: Shifts in the clinical epidemiology of severe malaria after scaling up control strategies in Mali
Source: PubMed Central journal article supplement (PMC9744791; doi:10.3389/fneur.2022.988960), 2022-11-29
Supplement: Table_3.pdf [file Table_3.pdf]

**Supplementary Table 3: Distribution of cases with other mixed severe malaria clinical phenotypes in the National Hospital of Mali records survey.**

| Clinical Phenotypes        | Pre SMC               | Post SMC               |
|----------------------------|-----------------------|------------------------|
|                            | [2013-2015]<br>(N=86) | [2016-2019]<br>(N=102) |
|                            | n                     | n                      |
| CM + Dehydration           | 11                    | 3                      |
| Hypoglycemia               | 17                    | 4                      |
| CM + Hypoglycemia          | 13                    | 16                     |
| SMA + Hypoglycemia         | 15                    | 14                     |
| CM + SMA + Hypoglycemia    | 12                    | 3                      |
| Dehydration                | 6                     | 11                     |
| SMA + Dehydration          | 3                     | 2                      |
| CM + Hyperparasitemia      | 1                     | 16                     |
| SMA + Hyperparasitemia     | 3                     | 9                      |
| DIVC                       | 2                     | 2                      |
| Hyperparasitemia           | 2                     | 4                      |
| CM + Respiratory distress  | 0                     | 4                      |
| SMA + Respiratory distress | 0                     | 2                      |
| Mixed syndromes            | 1                     | 12                     |
| Total                      | 86                    | 102                    |

DIVC= Disseminated Intravascular Coagulation

Mixed syndromes are different combinations including two, three or four of the following: CM, SMA, hyperparasitemia, hypoglycemia, Respiratory distress, DIVC, and Dehydration.
